# Supplementary material for: CoP/CoN heterostructural active centers supported on nitrogen carbon nanorod arrays as freestanding high-performance trifunctional electrocatalysts
Source: Royal Society of Chemistry journal article supplement (doi:10.1039/d3ta06935d), 2024-01-01
Supplement: d3ta06935d1.pdf [file d3ta06935d1.pdf]

## Supporting Information

### **CoP/CoN Heterostructural Active Centers Supported on Nitrogen Carbon Nanorod Arrays as Freestanding High-performance Trifunctional Electrocatalysts**

Linming Bai<sup>a</sup>, Dan Wang<sup>a</sup>, Hongchen Shen<sup>b</sup>, Wenlong Wang<sup>a</sup>, Shanshan  
Li<sup>a\*</sup>, Wei Yan<sup>a\*</sup>

*a Xi'an Key Laboratory of Solid Waste Recycling and Resource Recovery, Department  
of Environmental Engineering, Xi'an Jiaotong University, Xi'an, 710049, China*

*b Department of Civil and Environmental Engineering, Rice University, Houston, TX,  
77005, United States*

\* Corresponding author. E-mail address: yanwei@xjtu.edu.cn (W. Yan)  
shanshan0320@xjtu.edu.cn (S.S.Li)

## 1. Characterization

The X-ray diffraction (XRD) was performed with Bruker D8 ADVANC. The scanning electron microscopy images were collected from Zeiss GeminiSEM 500 instrument. Transmission electron microscopy (TEM) analysis was carried out using a Thermofisher Talos F200X microscope. The valence distributions of elements in all samples were analyzed by a Thermofisher X-ray photoelectron spectroscopy (XPS, ESCALAB Xi+), operated at 16 kV, 14.9 mA. Samples were analyzed at a pass energy of 100 eV or 30 eV. The C1s peak with binding energy at 284.8 eV of adventitious carbon calibrated all peaks. The oxygen temperature-programmed desorption was tested on Autosorb-iQC-TPX (Quantachrome) and the specific measurements were listed in Table S1.

## 2. Electrochemical measurements

The ORR, OER and HER were measured with CHI 760e electrochemical workstation (CH Instruments Ins., USA) with a three-electrode system, in which the as-prepared samples worked as a working electrode, and graphitic rod and Hg/HgO were chosen as the counter electrode and reference electrode, respectively. All the test potentials were calibrated to the reversible hydrogen electrode (RHE) potential from Eq. (1):

$$E_{\text{RHE}} = E_{\text{Hg/HgO}} + 0.0591 \times \text{pH} + 0.098 \quad (1)$$

Linear sweep voltammetry (LSV) curves were tested with a scan rate of 5 mV s<sup>-1</sup> and the geometric surface area of the working electrode was used for normalizing the obtained current density.

The Tafel slope (b) was calculated by Eq. (2):

$$\eta = a + b \times \log |j| \quad (2)$$

where  $\eta$  signifies the overpotential, a in this equation represents a constant.

The electrochemical active surface area (ECSA) was derived from Eq. (3):

$$\text{ECSA} = C_{\text{dl}} / C_s \quad (3)$$

where  $C_{\text{dl}}$  represents the electrochemical double-layer capacitance. Specifically,  $C_{\text{dl}}$  is the linear slope of  $\Delta j$  versus different scan rates, where  $\Delta j = \left( (j_{\text{anode}} - j_{\text{cathode}}) / 2 \right)$  is the current at the middle potential of the potential window at varying scanning rates. In addition, the CV curves of OER in the range of 1.1 V and 1.2 V at 10-50 mV s<sup>-1</sup> were investigated. Similarly, the CV curves of HER in the range of -0.7 V and -0.8 V were tested at scanning rates at 10-50 mV s<sup>-1</sup>.  $C_s$  is specified with 0.040 mF cm<sup>-2</sup>.

On the basis of LSV curves, the Koutechye-Levich (K-L) analysis (4-5) is applied to calculating the electron transfer number (n) in ORR process:

$$1/J = 1/J_k + 1/J_L = 1/J_k + 1/B\omega^{1/2} \quad (4)$$

$$B = 0.2nFC_0(D_0)^{2/3}\nu^{-1/6} \quad (5)$$

where  $J$  represents measured current density.  $J_k$  is kinetic current.  $J_L$  is diffusion limiting current density.  $\omega$  is the rotation speed of the disk.  $F$  is Faraday's constant (C mol<sup>-1</sup>).  $C_0$  (mol cm<sup>-3</sup>)

and  $D_0$  ( $\text{cm}^2 \text{s}^{-1}$ ) are the bulk concentration of  $\text{O}_2$  in 0.1 M KOH and the diffusion coefficient of  $\text{O}_2$ .  $\nu$  ( $\text{cm}^2 \text{s}^{-1}$ ) is the solution viscosity, which is specified as 0.01. Electrochemical impedance spectroscopy (EIS) was executed based on frequencies from 1 mHz to 10 kHz.

To further verify the  $n$  and  $\text{HO}_2^-$  yield of ORR, the rotating ring-disk electrode (RRDE) method was adopted according to the reported test method<sup>[9-10]</sup>.

### 3. Metal-air battery measurements

#### Assembly of aqueous ZABs

A custom-made Zn-air cell was used to fabricate aqueous ZABs. The fabrication procedure started with the preparation of air cathodes. In the process, carbon paper and the nickel foam are employed as gas diffusion layer and current collector, respectively. A flaky catalyst was fixed on the carbon paper, which was then attached to nickel foam. Using 6 mol  $\text{L}^{-1}$  KOH and 0.2 mol  $\text{L}^{-1}$   $\text{Zn}(\text{OAc})_2$  solution as an electrolyte, the Zn plated and prepared air cathodes acted as anode and cathodes. The discharge polarization curve was obtained from CHI760e workstation. The galvanostatic discharge charge cycling measurements (battery life test) were executed with Microcurrent battery test systems (LAND CT3002A instrument, Wuhan LAND Electronic Co.Ltd., China).

#### Assembly of flexible all-solid-state Zinc-air battery

The electrolyte was prepared as follows: PVA (1 g) was dispersed in 24 mL deionized water, then heated and stirred for a period to obtain a clear solution. Then 1 mL mixture of 16 mol  $\text{L}^{-1}$  potassium hydroxide and 0.2 mol  $\text{L}^{-1}$  Zinc acetate dropwise and mixed at 95°C for a while. The resulting viscous solution was poured into the glass petri dish and frozen at -18°C for 12 h.

The prepared polymer electrolyte of PVA-KOH solution is sandwiched between a commercial Zn foil anode (1 cm  $\times$  3 cm) and air cathode (1 cm  $\times$  3 cm), fabricating to a flexible Zn-air battery. The Polyethylene terephthalate (PET) film with holes was used as an outer package to seal the device.

### 4. DFT calculation

The present first principle DFT calculations are performed by Vienna Ab initio Simulation Package (VASP 6.2.1)<sup>[1]</sup> with the projector augmented wave (PAW) method<sup>[2, 3]</sup>. The exchange-correlation energy was treated based on the generalized gradient approximation (GGA) by using Perdew-Burke-Ernzerhof (PBE) function<sup>[4]</sup>. The Monkhorst-Pack scheme with a k-point separate on length of 0.05  $\text{\AA}^{-1}$  was utilized for sampling the first Brillion zone<sup>[5]</sup>, which was set as 3 $\times$ 3 $\times$ 1. The CoP (010) and CoN (010) surface models cut 3 and 4 layers from CoP and CoN bulk, respectively. The CoP-CoN model was combined by CoP (010) and CoN (010) surface for lattice matching, forming 5 layers heterojunction. The bottom layer of CoP and CoN models were fixed while the rest atoms were fully relaxed, and the whole atoms were fully relaxed in CoP-CoN model during all calculations. The self-consistent calculations apply a convergence energy threshold of 10<sup>-5</sup> eV. The equilibrium lattice constants are optimized with maximum stress on each atom within 0.01 eV/ $\text{\AA}$ .

The ORR is believed to process in the four electrons pathway<sup>[6,7]</sup>,

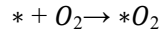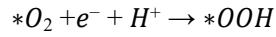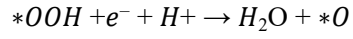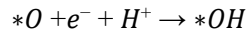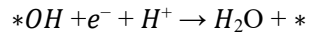

Where, the \* donates an active site on the catalyst.

To obtain the free energy profile, Gibbs free energies for all the states were calculated based on the ZPE-corrected DFT total energy, which was set as the enthalpy at 0 K. It can be calculated with:

$$G = H - TS = E_{DFT} + E_{ZPE} + \int_0^{298.15K} C_V dT - TS$$

where  $E_{DFT}$  is the total energy getting from DFT optimization,  $E_{ZPE}$  is the zero-point vibrational energy using the vibrational frequency calculations were performed via the finite-difference approach [8],  $C_V$  is the heat capacity,  $T$  is the kelvin temperature, and  $S$  is the entropy. The free energy for the gas-phase molecule was computed from thermodynamics by utilizing the standard thermodynamics data at the standard state.

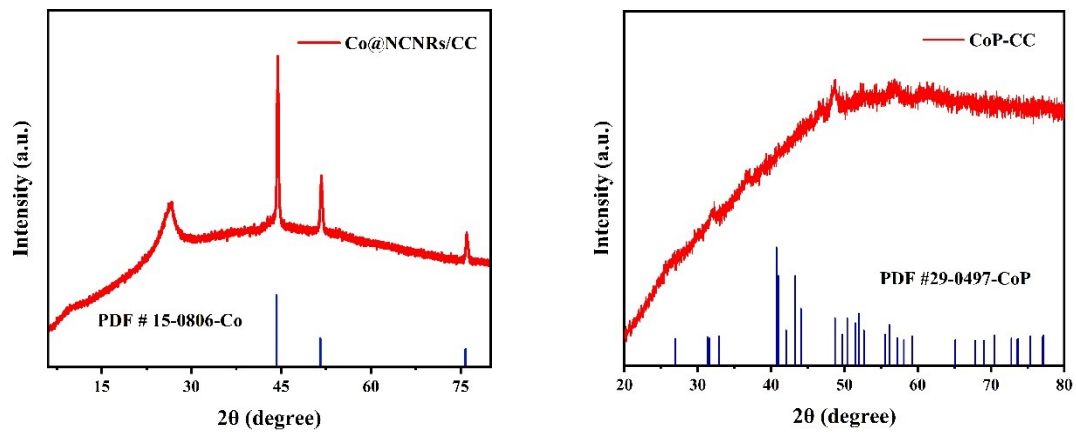

Fig. S1. XRD patterns of Co@NCNRs/CC and CoP/CC.

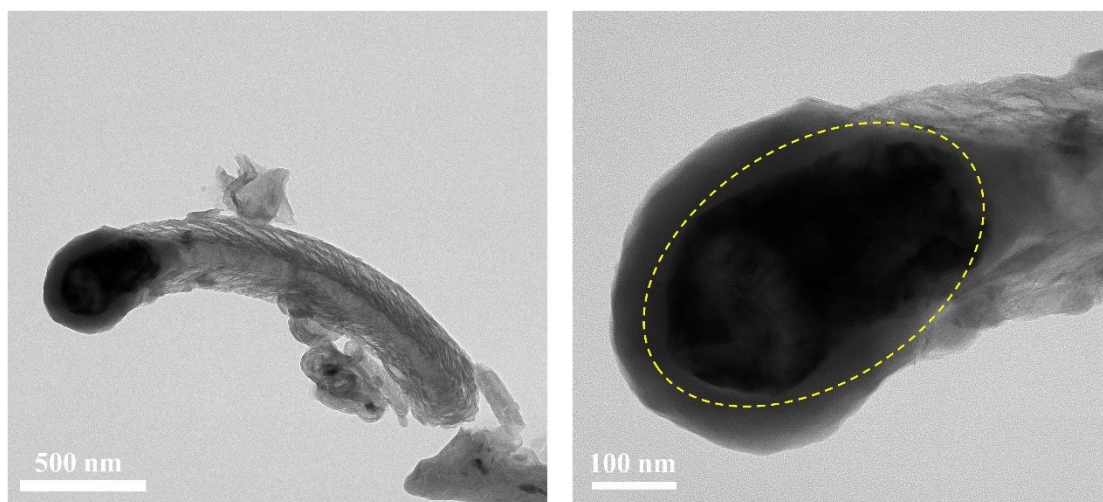

Fig. S2. TEM images for the CoP/CoN particles are encapsulated in the carbon layer.

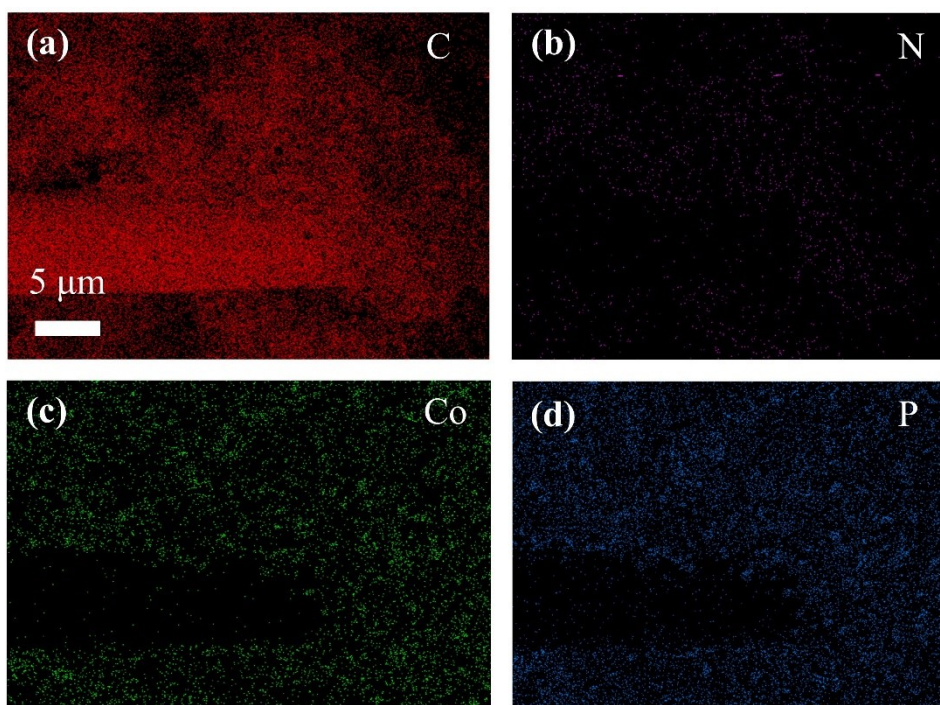

Fig. S3. elemental mapping images of CoP/CoN@NCNRs/CC.

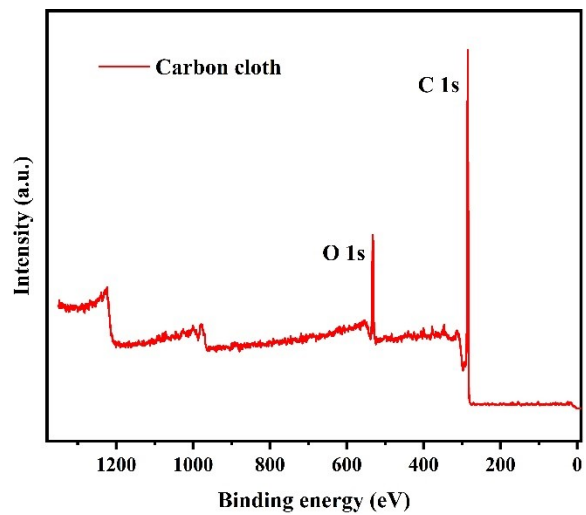

Fig. S4. XPS survey spectrum of carbon cloth (CC).



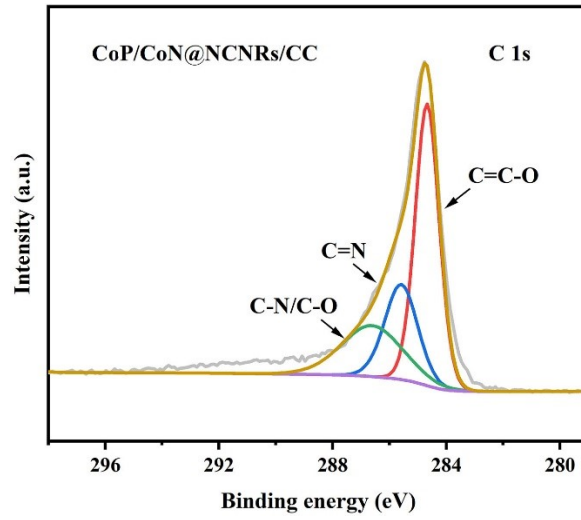

Fig. S5. XPS survey spectrum C 1s of CoP/CoN@NCNRs/CC.

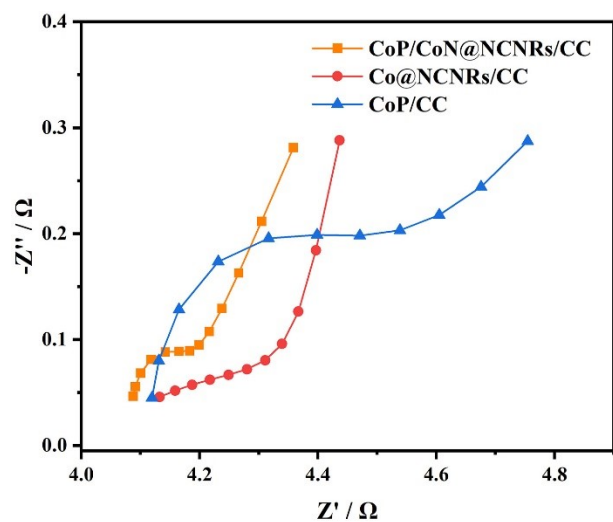

Fig. S6. EIS plots for CoP/CoN@NCNRs/CC, Co@NCNRs/CC and CoP/CC.

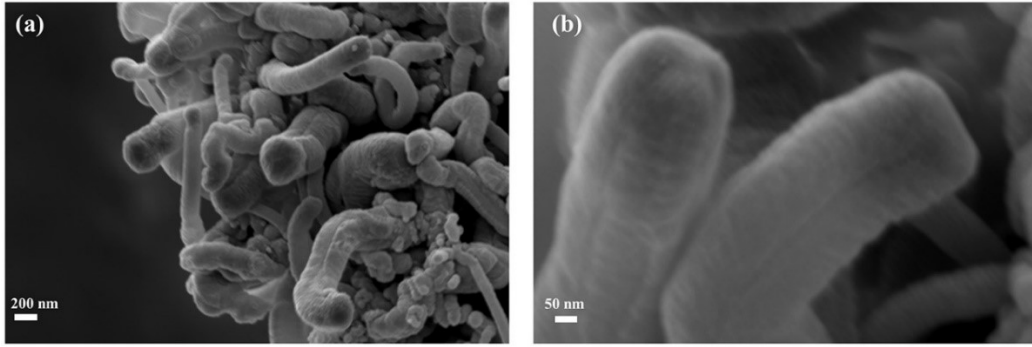

Fig. S7. SEM of CoP/CoN@NCNRs/CC after cycle test.

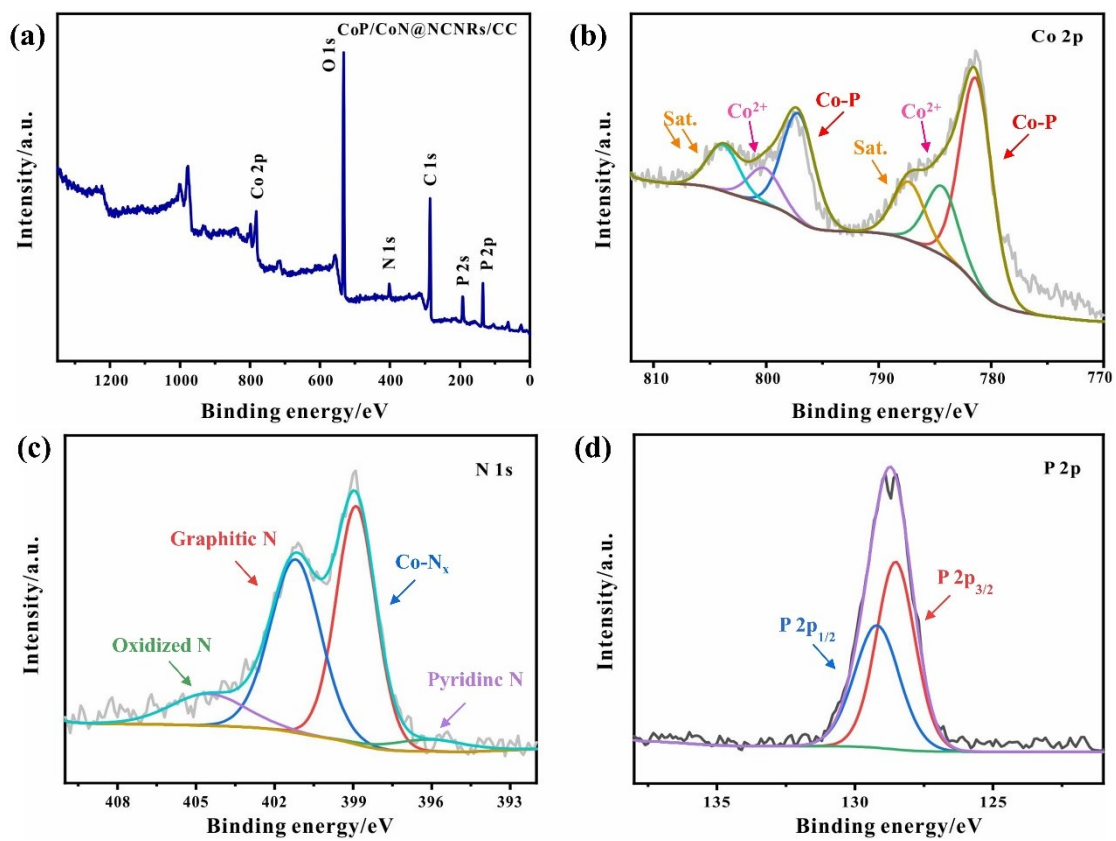

Fig. S8. (a) XPS survey spectrum (b) Co 2p, (c) N 1s, and (d) P 2p of CoP/CoN@NCNRs/CC after cycle test.

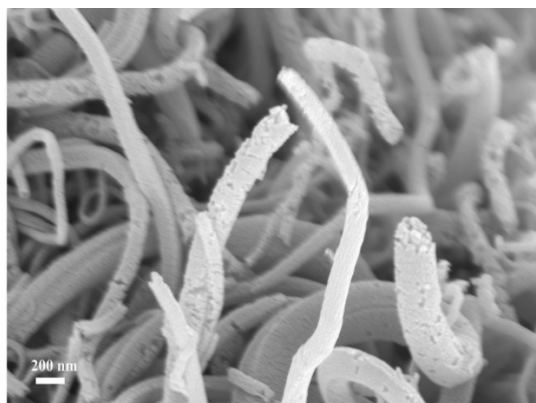

Fig. S9. SEM of the acid sample.

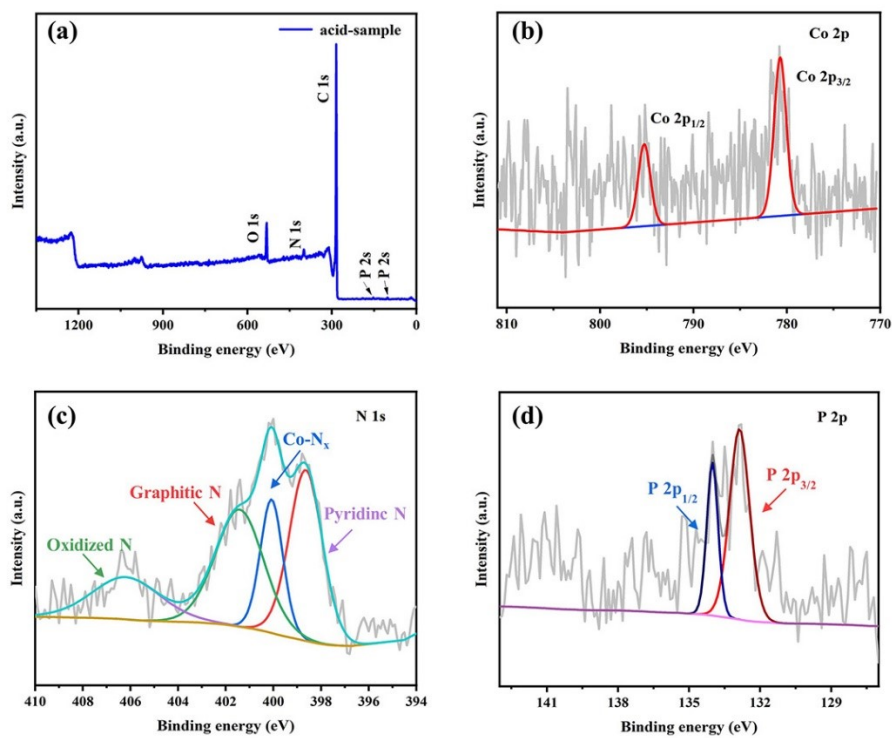

Fig. S10. (a) XPS survey spectrum (b) Co 2p, (c) N 1s, and (d) P 2p of the acid sample.

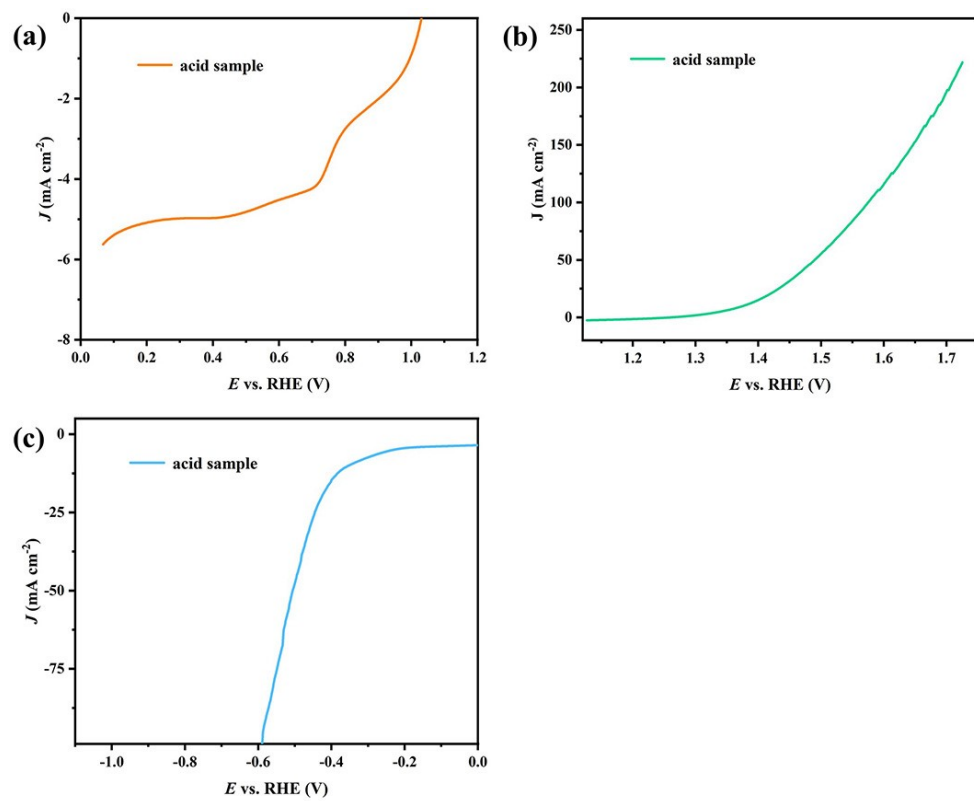

Fig. S11. (a) ORR curve; (b) OER curve and (c) HER curve of acid sample.

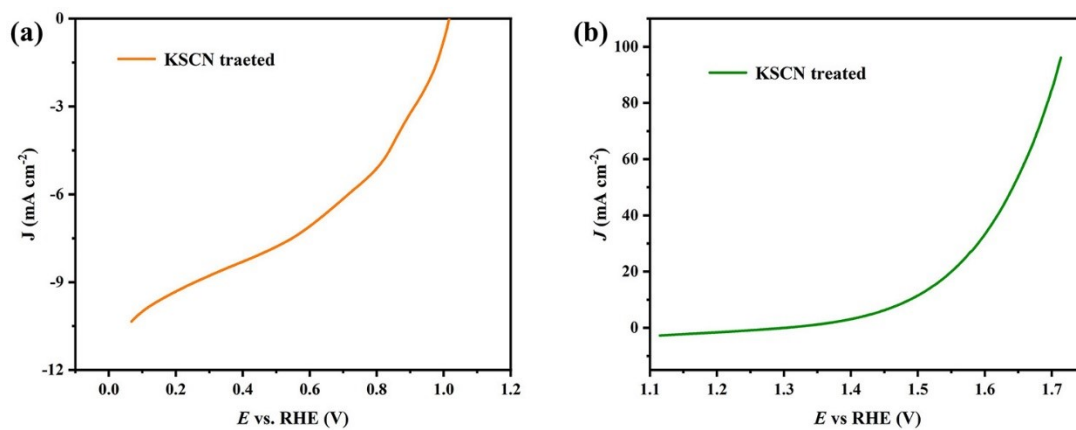

Fig. S12. ORR and OER curves of KSCN treated acid sample.



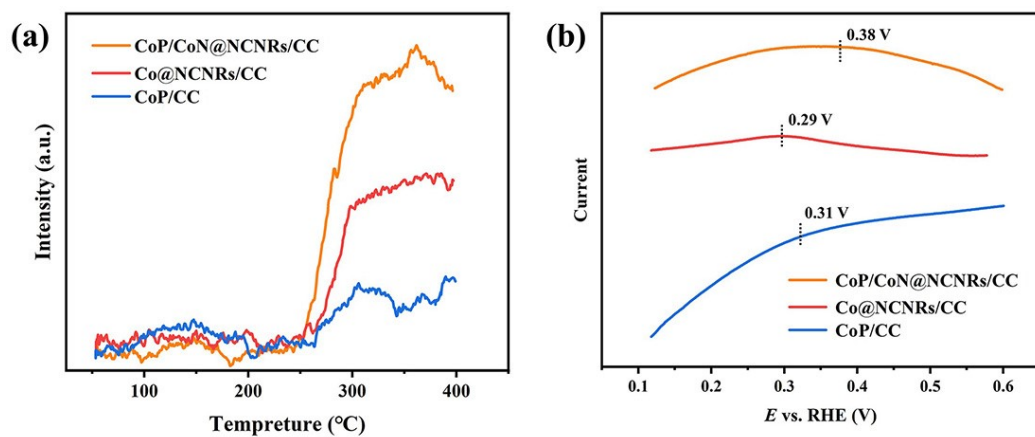

Fig. S13. (a) O<sub>2</sub>-TPD curves of CoP/CoN@NCNRs/CC, Co@NCNRs/CC and CoP /CC. (b) Anodic scans showing the oxidative adsorption of hydroxide in N<sub>2</sub>-saturated KOH solution for CoP/CoN@NCNRs/CC, Co@NCNRs/CC and CoP /CC. Currents here were normalized so that the curves could fit in the same plot.

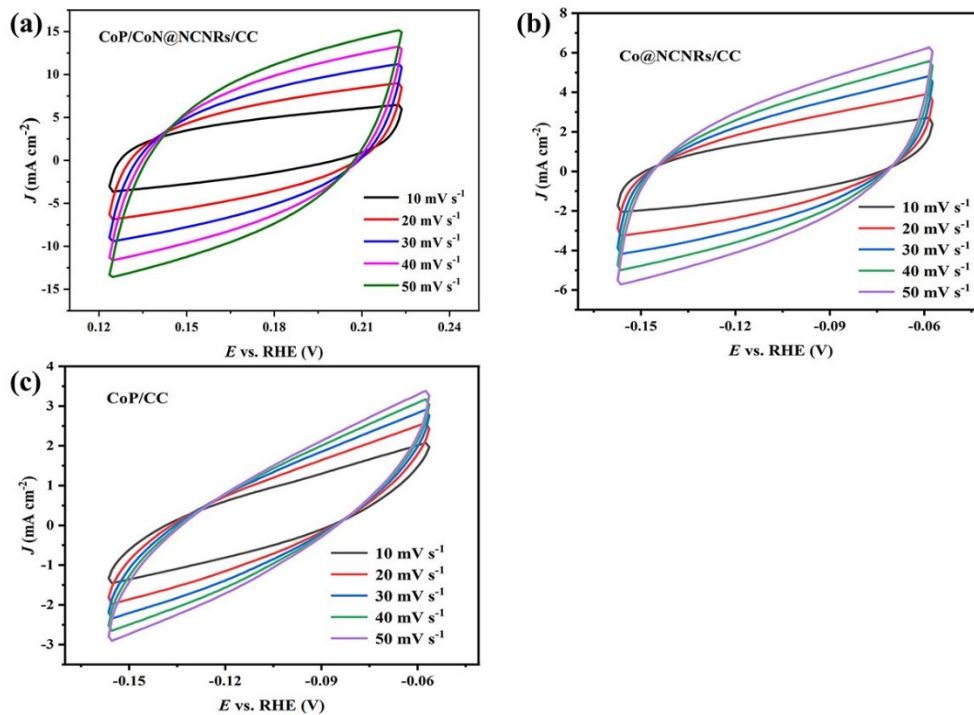

Fig. S14. CV curves under different scan rates for (a) CoP/CoN@NCNRs/CC; (b) Co@NCNRs/CC; (c) CoP/CC.

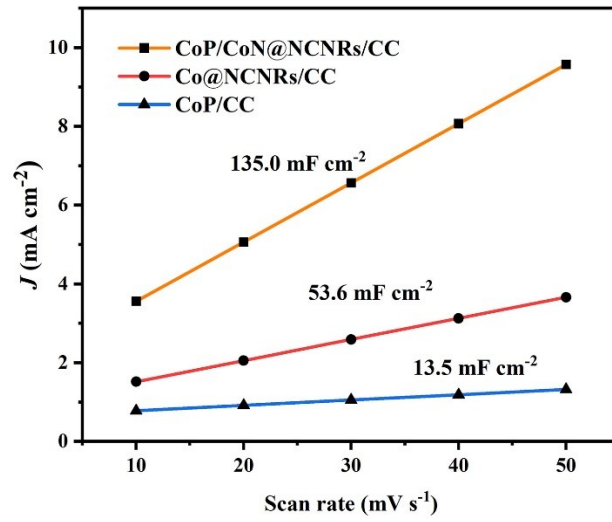

Fig. S15. Calculated  $C_{dl}$  for (a) CoP/CoN@NCNRs/CC; (b) Co@NCNRs/CC; (c) CoP/CC.

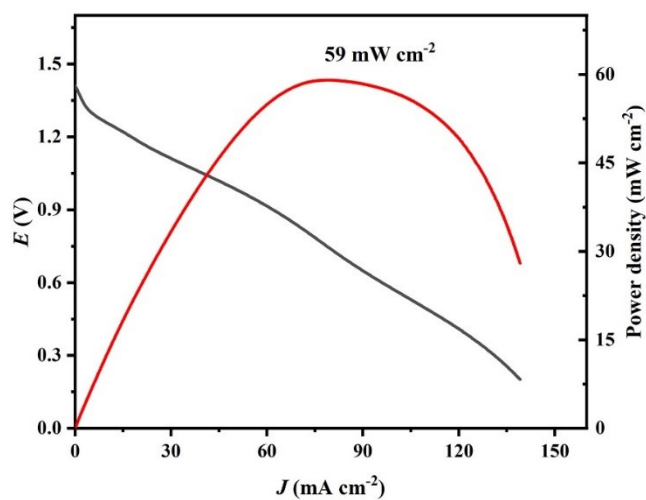

Fig. S16. Discharge curves and the power density curve for flexible ZAB.

**Table S1.**

| Test procedures | Test details                                                                                                                              |
|-----------------|-------------------------------------------------------------------------------------------------------------------------------------------|
| Step 1          | 0.1 g of sample was purged with helium gas at 200°C for 2 h, and then cooled down to 50°C                                                 |
| Step 2          | the sample was purged with 4% O <sub>2</sub> / He for 1 h                                                                                 |
| Step 3          | the sample was slowly heated from ambient temperature to 400 °C at a heating rate of 10 °C min <sup>-1</sup> in N <sub>2</sub> atmosphere |

**Table S2.** Comparison of HER electrocatalytic activity of recently reported transition metal-based electrocatalysts in alkaline electrolyte.

| Catalyst                                         | $E_{j=10}$ / (V vs. RHE) | Tafel slope (mV dec <sup>-1</sup> ) | Ref.      |
|--------------------------------------------------|--------------------------|-------------------------------------|-----------|
| CoP/CoN@NCNRs/CC                                 | 165 mV                   | 118                                 | This work |
| CoFeN-NCNTs//CCM                                 | 151 mV                   | 130                                 | [9]       |
| Co-N-MoO <sub>2</sub>                            | 258 mV                   | 126.8                               | [10]      |
| Co <sub>3</sub> O <sub>4</sub> /MoS <sub>2</sub> | 205 mV                   | 128                                 | [11]      |
| CoP@PNC-DoS                                      | 173 mV                   | 62.1                                | [12]      |
| CoP/Ni <sub>2</sub> P                            | 200 mV                   | 84                                  | [13]      |
| Co-NT/NF                                         | 178 mV                   | 75                                  | [14]      |
| Co <sub>0.85</sub> Se@NC                         | 230 mV                   | 125                                 | [15]      |
| CoTe                                             | 283 mV                   | 90.5                                | [16]      |
| Co/N-CNF                                         | 241 mV                   | 132                                 | [17]      |
| CoLIm                                            | 162 mV                   | 80.6                                | [18]      |
| Zn-Co-S NN/CFP                                   | 234 mV                   | 109                                 | [19]      |
| NiS-Ni(OH) <sub>2</sub> @MoS <sub>2+x</sub> /NF  | 226 mV                   | 81                                  | [20]      |
| NCNT/CoFe-CoFe <sub>2</sub> O <sub>4</sub>       | 204                      | 91                                  | [21]      |

**Table S3.** Comparison of ZABs performance on recently reported transition metal-based electrocatalysts.

| Catalyst                                                 | Peak power density (mW cm <sup>-2</sup> ) | Specific Capacity (mAh g <sup>-1</sup> ) | Cycling conditions                                   | Ref.      |
|----------------------------------------------------------|-------------------------------------------|------------------------------------------|------------------------------------------------------|-----------|
| CoP/CoN@NCNRs/CC                                         | 120                                       | 775                                      | 10 mA cm <sup>-2</sup> , 30 min/cycle for 420 h      | This work |
| CoNi@NCNTs/CC                                            | 138                                       | 782                                      | 5 mA cm <sup>-2</sup> , 40 min/cycle for 370 h       | [22]      |
| NiFe@N-CFs                                               | 102                                       | 712                                      | 10 mA cm <sup>-2</sup> , 40 min/cycle for 150 h      | [23]      |
| Fe <sub>0.5</sub> Co <sub>0.5</sub> O <sub>x</sub> /NrGO | 86                                        | 756                                      | 10 mA cm <sup>-2</sup> , 2 h per cycle for 60 cycles | [24]      |
| NiO/CoN PINWs                                            | 80                                        | 648                                      | 3 mA cm <sup>-2</sup> , 10 min/cycle for 50 cycles   | [25]      |
| CoP@PNC-DoS                                              | 138.6                                     | 730.5                                    | 30 mA cm <sup>-2</sup> , 30 min/cycle for 350 cycles | [12]      |
| FeS/Fe <sub>3</sub> C@N-S-C                              | 63                                        | N.A.                                     | 20 mA cm <sup>-2</sup> , 10 min/cycle for 24 h       | [26]      |
| WN-Ni@N,P-CNT                                            | 126.2                                     | 827.8                                    | 5 mA cm <sup>-2</sup> , 20 min/cycle for 330 h       | [27]      |
| CoS <sub>2</sub> @MoS <sub>2</sub> @NiS <sub>2</sub>     | 80.8                                      | ~710                                     | 10 mA cm <sup>-2</sup> , for 40 h                    | [28]      |

## References

- [1] G. Kresse and J. Furthmüller, Efficiency of ab-initio total energy calculations for metals and semiconductors using a plane-wave basis set, *Computational Materials Science*, 1996 (1) 15-50.
- [2] P. E. Blochl, Projector augmented-wave method, *Physical Review B*, 1994 (24) 17953-17979.
- [3] G. Kresse and D. Joubert, From ultrasoft pseudopotentials to the projector augmented-wave method, *Physical Review B*, 1999 (3) 1758-1775.
- [4] J. P. Perdew, K. Burke, and M. Ernzerhof, Generalized gradient approximation made simple, *Physical Review Letters*, 1996 (18) 3865-3868.
- [5] H. J. Monkhorst, and J. D. Pack, Special points for brillouin-zone integrations, *Physical Review B*, 1976 (12) 5188-5192.
- [6] A. Kulkarni et al., Understanding Catalytic Activity Trends in the Oxygen Reduction Reaction, *Chemical Reviews*, 2018 (5) 2302-2312.
- [7] Y. Nie, L. Li, and Z. D. Wei, Recent advancements in Pt and Pt-free catalysts for oxygen reduction reaction, *Chemical Society Reviews*, 2015 (8) 2168-2201.
- [8] A. P. Scott and L. Radom, Harmonic vibrational frequencies: An evaluation of Hartree-Fock, Moller-Plesset, quadratic configuration interaction, density functional theory, and semiempirical scale factors, *Journal of Physical Chemistry*, 1996 (41) 16502-16513.
- [9] G. Z. Zhou, G. S. Liu, X. B. Liu, Q. P. Yu, H. M. Mao, Z. Y. Xiao, et al., 1D/3D Heterogeneous Assembling Body as Trifunctional Electrocatalysts Enabling Zinc–Air Battery and Self-Powered Overall Water Splitting, *Adv. Funct. Mater.*, 32 (2022) 2107608.
- [10] L. J. Yang, J. Y. Yua, Z. Q. Wei, G. X. Li, L. D. Cao, W. J. Zhou, et al., Co-N-doped MoO<sub>2</sub> nanowires as efficient electrocatalysts for the oxygen reduction reaction and hydrogen evolution reaction, *Nano Energy* 41 (2017) 772–779.
- [11] A. Muthurasua, V. Maruthapandian, H. Y. Kim, Metal-organic framework derived Co<sub>3</sub>O<sub>4</sub>/MoS<sub>2</sub> heterostructure for efficient bifunctional electrocatalysts for oxygen evolution reaction and hydrogen evolution reaction, *Applied Catalysis B: Environmental* 248 (2019) 202–210.
- [12] Y. P. Li, Y. Liu, Q. Z. Qian, G. R. Wang, G. Q. Zhang, Supramolecular assisted one-pot synthesis of donut-shaped CoP@PNC hybrid nanostructures as multifunctional electrocatalysts for rechargeable Zn-air batteries and self-powered hydrogen production, *Energy Storage Materials* 28 (2020) 27–36.
- [13] L. L. Chai, Z. Y. Hu, X. Wang, Y. W. Xu, L. J. Zhang, T. T. Li, Stringing Bimetallic Metal–Organic Framework-Derived Cobalt Phosphide Composite for High-Efficiency Overall Water Splitting, *Adv. Sci.* 7 (2020) 1903195.
- [14] J. Zhang, M. Song, J. Wang, Z. X. Wu, X. E. Liu, In-situ transformation to accordion-like core-shell structured metal@metallic hydroxide nanosheet from nanorod morphology for overall water-splitting in alkaline media, *Journal of Colloid and Interface Science* 559 (2020) 105-114.
- [15] T. Meng, J. W. Qin, S. G. Wang, D. Zhao, B. G. Mao, M. H. Cao, In situ coupling of Co<sub>0.85</sub>Se and N-doped carbon via one-step selenization of metal–organic frameworks as a trifunctional catalyst for overall water splitting and Zn–air batteries, *J. Mater. Chem. A*, 5 (2017) 7001-7014.
- [16] M. Nath, U. D. Silva, H. Singh, M. Perkins, W. P. R. Liyanage, S. Umaphathi, Cobalt Telluride: A Highly Efficient Trifunctional Electrocatalyst for Water Splitting and Oxygen Reduction, *ACS Appl. Energy Mater.* 4 (2021) 8158-8174.
- [17] J. Liu, J. S. Zhou, M. K. H. Leung, Valence Engineering of Polyvalent Cobalt Encapsulated in a Carbon Nanofiber as an Efficient Trifunctional Electrocatalyst for the Zn–Air Battery and Overall

- Water Splitting, *ACS Appl. Mater. Interfaces*, 14 (2022) 4399-4408.
- [18] E. Armakola, M. Gjika, A. Visa, M. B. García, P. O. Pastor, D. C. Lazarte, et al., Exploiting the Multifunctionality of  $M^{2+}$ /Imidazole–Etidronates for Proton Conductivity ( $Zn^{2+}$ ) and Electrocatalysis ( $Co^{2+}$ ,  $Ni^{2+}$ ) toward the HER, OER, and ORR, *ACS Appl. Mater. Interfaces* 14 (2022) 11273-11287.
- [19] X. Y. Wu, X. P. Han, X. Y. Ma, W. Zhang, Y. D. Deng, C. Zhong, et al., Morphology-Controllable Synthesis of Zn–Co-Mixed Sulfide Nanostructures on Carbon Fiber Paper Toward Efficient Rechargeable Zinc–Air Batteries and Water Electrolysis, *ACS Appl. Mater. Interfaces* 9 (2017) 12574-12583.
- [20] J. M. Bai, T. Meng, D. L. Guo, S. G. Wang, B. G. Mao, M. H. Cao,  $Co_9S_8@MoS_2$  Core–Shell Heterostructures as Trifunctional Electrocatalysts for Overall Water Splitting and Zn–Air Batteries, *ACS Appl. Mater. Interfaces* 10 (2018) 1678-1689.
- [21] Q. Qin, P. Li, L. L. Chen, X. E. Liu, Coupling Bimetallic Oxides/Alloys and N-Doped Carbon Nanotubes as Tri-Functional Catalysts for Overall Water Splitting and Zinc–Air Batteries, *ACS Appl. Mater. Interfaces* 10 (2018) 39828-39838.
- [22] W. W. Tian, J. T. Ren, Z. Y. Yuan, In-situ cobalt-nickel alloy catalyzed nitrogen-doped carbon nanotube arrays as superior freestanding air electrodes for flexible zinc-air and aluminum-air batteries, *Applied Catalysis B: Environmental* 317 (2022) 121764.
- [23] Y. Niu, X. Teng, S. Gong, Z. Chen, A bimetallic alloy anchored on biomass-derived porous N-doped carbon fibers as a self-supporting bifunctional oxygen electrocatalyst for flexible Zn–air batteries, *J. Mater. Chem. A*, 8 (2020) 13725-13734.
- [24] L. Wei, H. E. Karahan, S. Zhai, H. Liu, X. Chen, Z. Zhou, et al., Amorphous Bimetallic Oxide–Graphene Hybrids as Bifunctional Oxygen Electrocatalysts for Rechargeable Zn–Air Batteries, *Adv. Mater.*, 29 (2017) 1701410.
- [25] J. Yin, Y. Li, F. Lv, Q. Fan, Y. Q. Zhao, Q. Zhang, et al., NiO/CoN Porous Nanowires as Efficient Bifunctional Catalysts for Zn–Air Batteries, *ACS Nano*, 11 (2017) 2275-2283.
- [26] F. T. Kong, X. H. Fan, A. G. Kong, Z. Q. Zhou, X. Y. Zhang, Y. K. Shan, Covalent Phenanthroline Framework Derived  $FeS@Fe_3C$  Composite Nanoparticles Embedding in N-S-Codoped Carbons as Highly Efficient Trifunctional Electrocatalysts, *Adv. Funct. Mater.*, 28 (2018) 1803973.
- [27] Q. Zhang, F. Luo, X. Long, X. X. Yu, K. G. Qu, Z. H. Yang, N, P doped carbon nanotubes confined WN–Ni Mott–Schottky heterogeneous electrocatalyst for water splitting and rechargeable zinc-air batteries, *Applied Catalysis B: Environmental* 298 (2021) 120511.
- [28] X. Li, Z. H. Yin, M. Cui, L. Gao, A. M. Liu, W. N. Su, et al., Double shelled hollow  $CoS_2@MoS_2@NiS_2$  polyhedron as advanced trifunctional electrocatalyst for zinc-air battery and self-powered overall water splitting, *Journal of Colloid and Interface Science* 610 (2022) 653-662.
